# Supplementary material
Source: Springer Nature journal article supplement (https://www.springermedizin.de/resource/supplementary/12906_2013_1370_MOESM2_ESM.pdf/9521766)
Supplement: MOESM2 [file 9521766]

**Eligible registered osteopaths N= 3132**

| England | Wales | Scotland | N Ireland |
|---------|-------|----------|-----------|
| 2921    | 85    | 110      | 16        |
| 93.3%   | 2.7%  | 3.5%     | 0.5%      |

**Stratified random sample of osteopaths N= 800**

| England | Wales | Scotland | N Ireland |
|---------|-------|----------|-----------|
| 748     | 20    | 28       | 4         |
| 93.5%   | 2.5%  | 3.5%     | 0.5%      |

**Osteopaths recruiting patients N=259**

| England | Wales | Scotland | N Ireland |
|---------|-------|----------|-----------|
| 237     | 8     | 13       | 1         |
| 91.5%   | 3.1%  | 5.0%     | 0.4%      |

**Osteopaths not recruiting N= 541**

| England | Wales | Scotland | N Ireland |
|---------|-------|----------|-----------|
| 511     | 12    | 15       | 3         |
| 94.5%   | 2.2%  | 2.7%     | 0.6%      |

**Patients returning questionnaires N=1701**

| England | Wales | Scotland | N Ireland |
|---------|-------|----------|-----------|
| 1547    | 46    | 107      | 1         |
| 91.0%   | 2.7%  | 6.3%     | 0.06%     |

Mean no. per osteopath

|     |    |    |   |
|-----|----|----|---|
| 6.5 | 12 | 14 | 1 |
|-----|----|----|---|

**Datasets in analysis N=1649**

| England | Wales | Scotland | N Ireland |
|---------|-------|----------|-----------|
| 91.1%   | 2.6%  | 6.2%     | 0.0%      |

**Datasets excluded N= 52**

| Age < 16 | Age not known | Blank |
|----------|---------------|-------|
| 36       | 15            | 1     |
